# Supplementary material for: Target-dependent suppression of siRNA production modulates the levels of endogenous siRNAs in the Caenorhabditis elegans germline
Source: Oxford University Press journal article supplement (doi:10.1242/dev.200692), 2022-07-25
Supplement: dev200692supp.pdf [file dev200692supp.pdf]

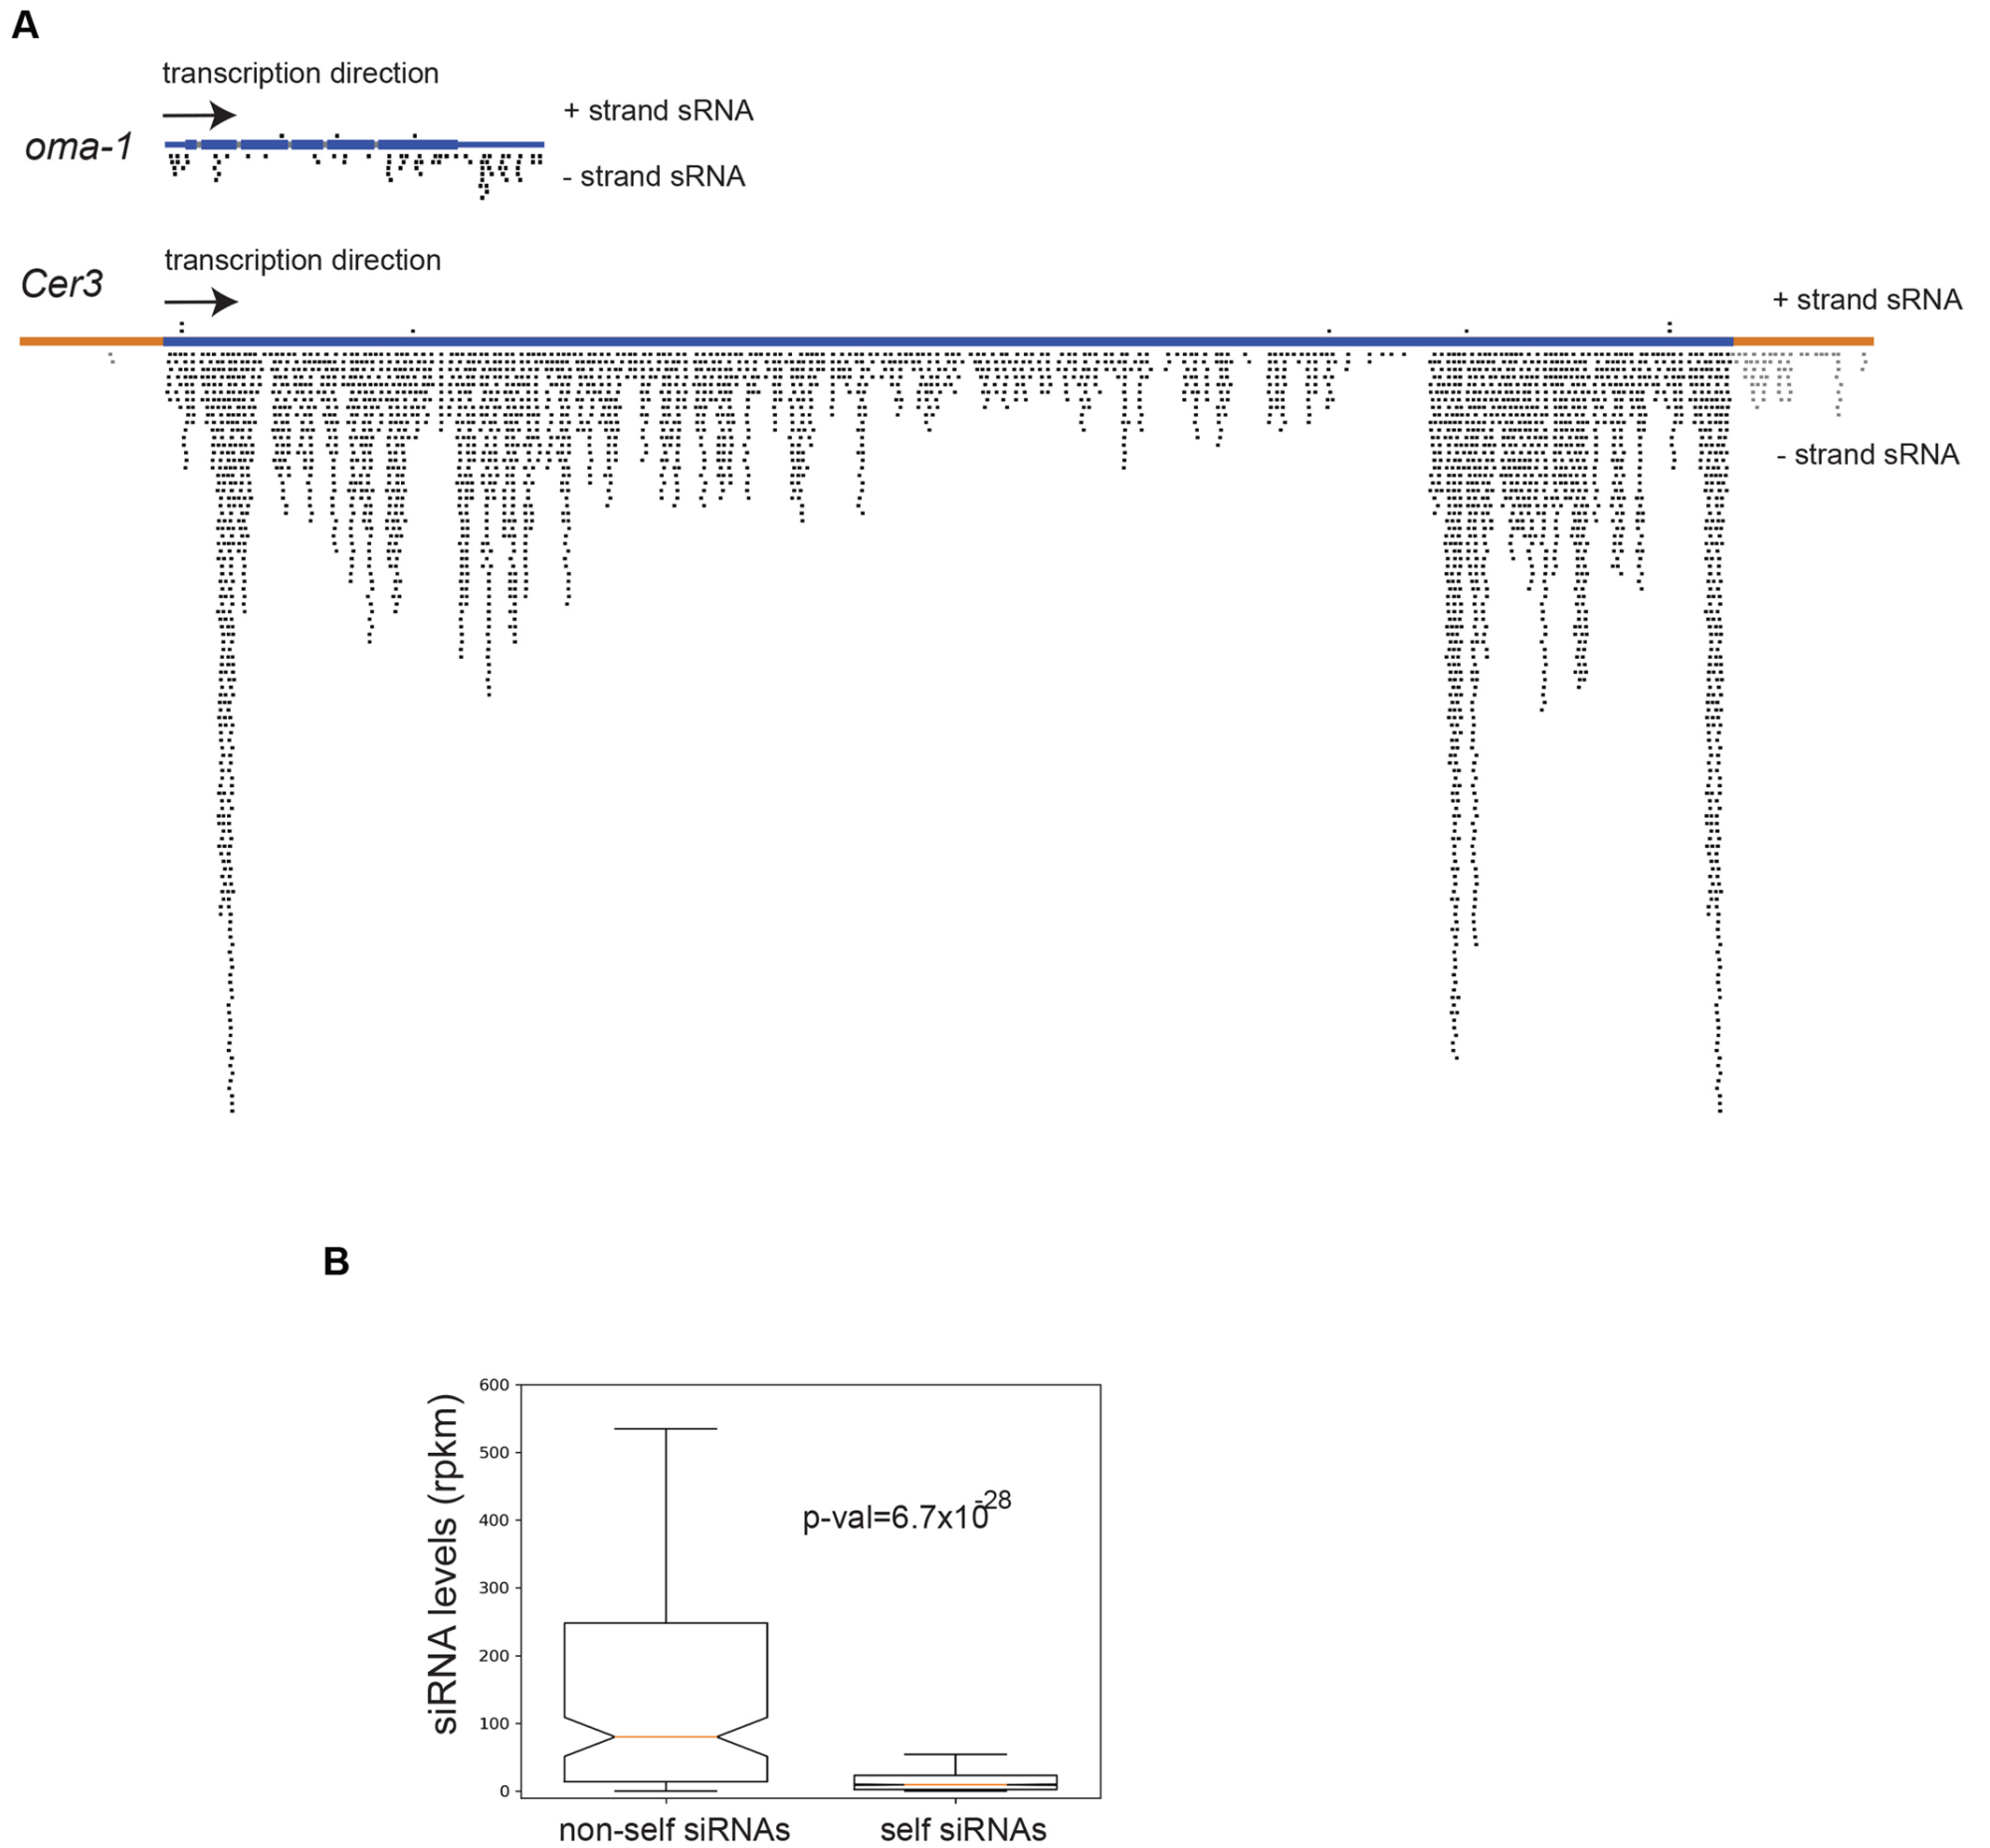

**Fig. S1.** Differential expression of self and non-self siRNAs. **(A)** siRNA track plots for *oma-1* and the LTR retrotransposon *Cer3* in WT adult animals from the same sequencing run. Each sequenced small RNA read is indicated as a black block above (sense sRNA) or under (antisense sRNA) the gene track. **(B)** Box plot of average siRNA levels of native germline nuclear RNAi targets (non-self siRNAs) and germline genes (self siRNAs) in WT animals. The native germline nuclear RNAi target genes were obtained from (Ni, Chen et al. 2014). The germline genes are the oogenic genes identified in (Ortiz, Noble et al. 2014).

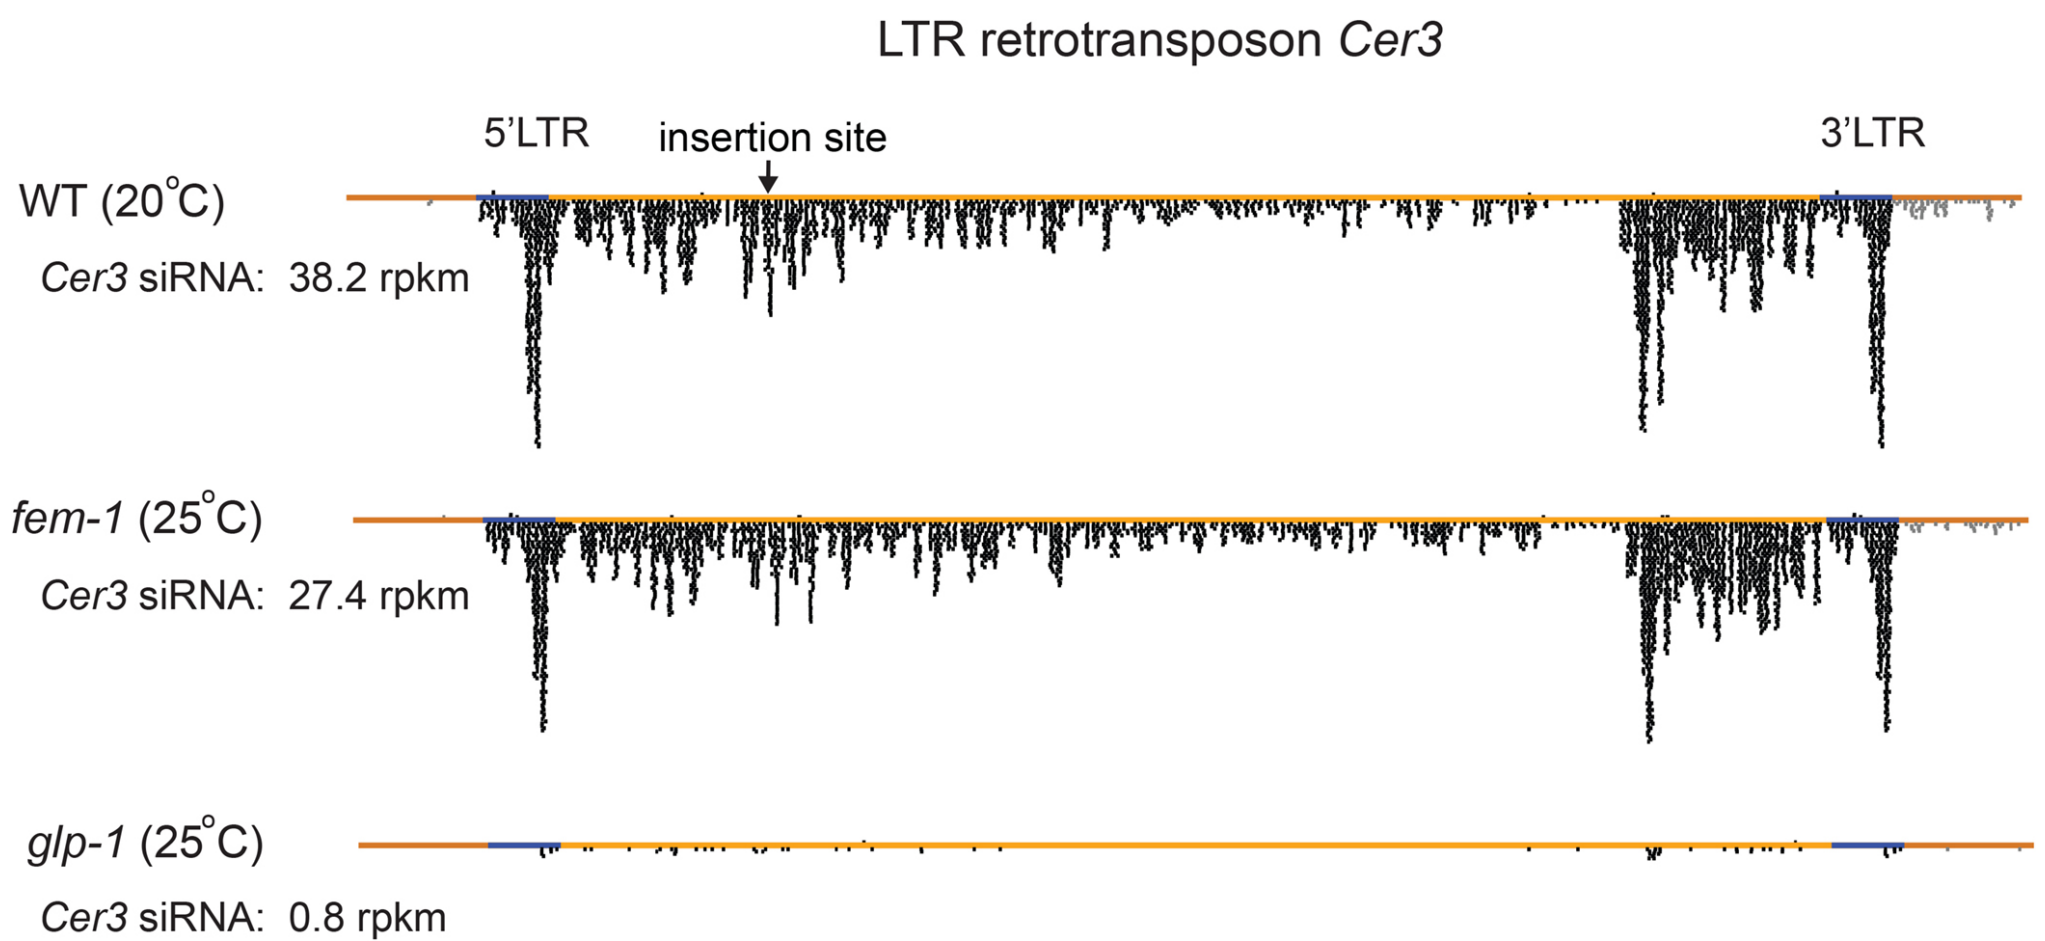

**Fig. S2.** Germline-enriched expression of *Cer3* siRNAs. *Cer3* siRNA track plots for adult WT (20°C), *fem-1*(*hc17*) (25° C, producing functional female germline, but lack of embryo in the uterus due to spermatogenesis defect) (Nelson, Lew et al. 1978), and *glp-1*(*e2141*) (25°C, germline depleted) (Kodoyianni, Maine et al. 1992) animals. As a quality control for the sRNA-seq, 30%, 12.7%, and 37% of sequenced small RNAs were mapped to microRNAs for WT, *fem-1*, and *glp-1*, respectively. The rpkms values of *Cer3* siRNAs are indicated in the figure. The insertion site in *Cer3* used in this study to express ectopic siRNAs is indicated.

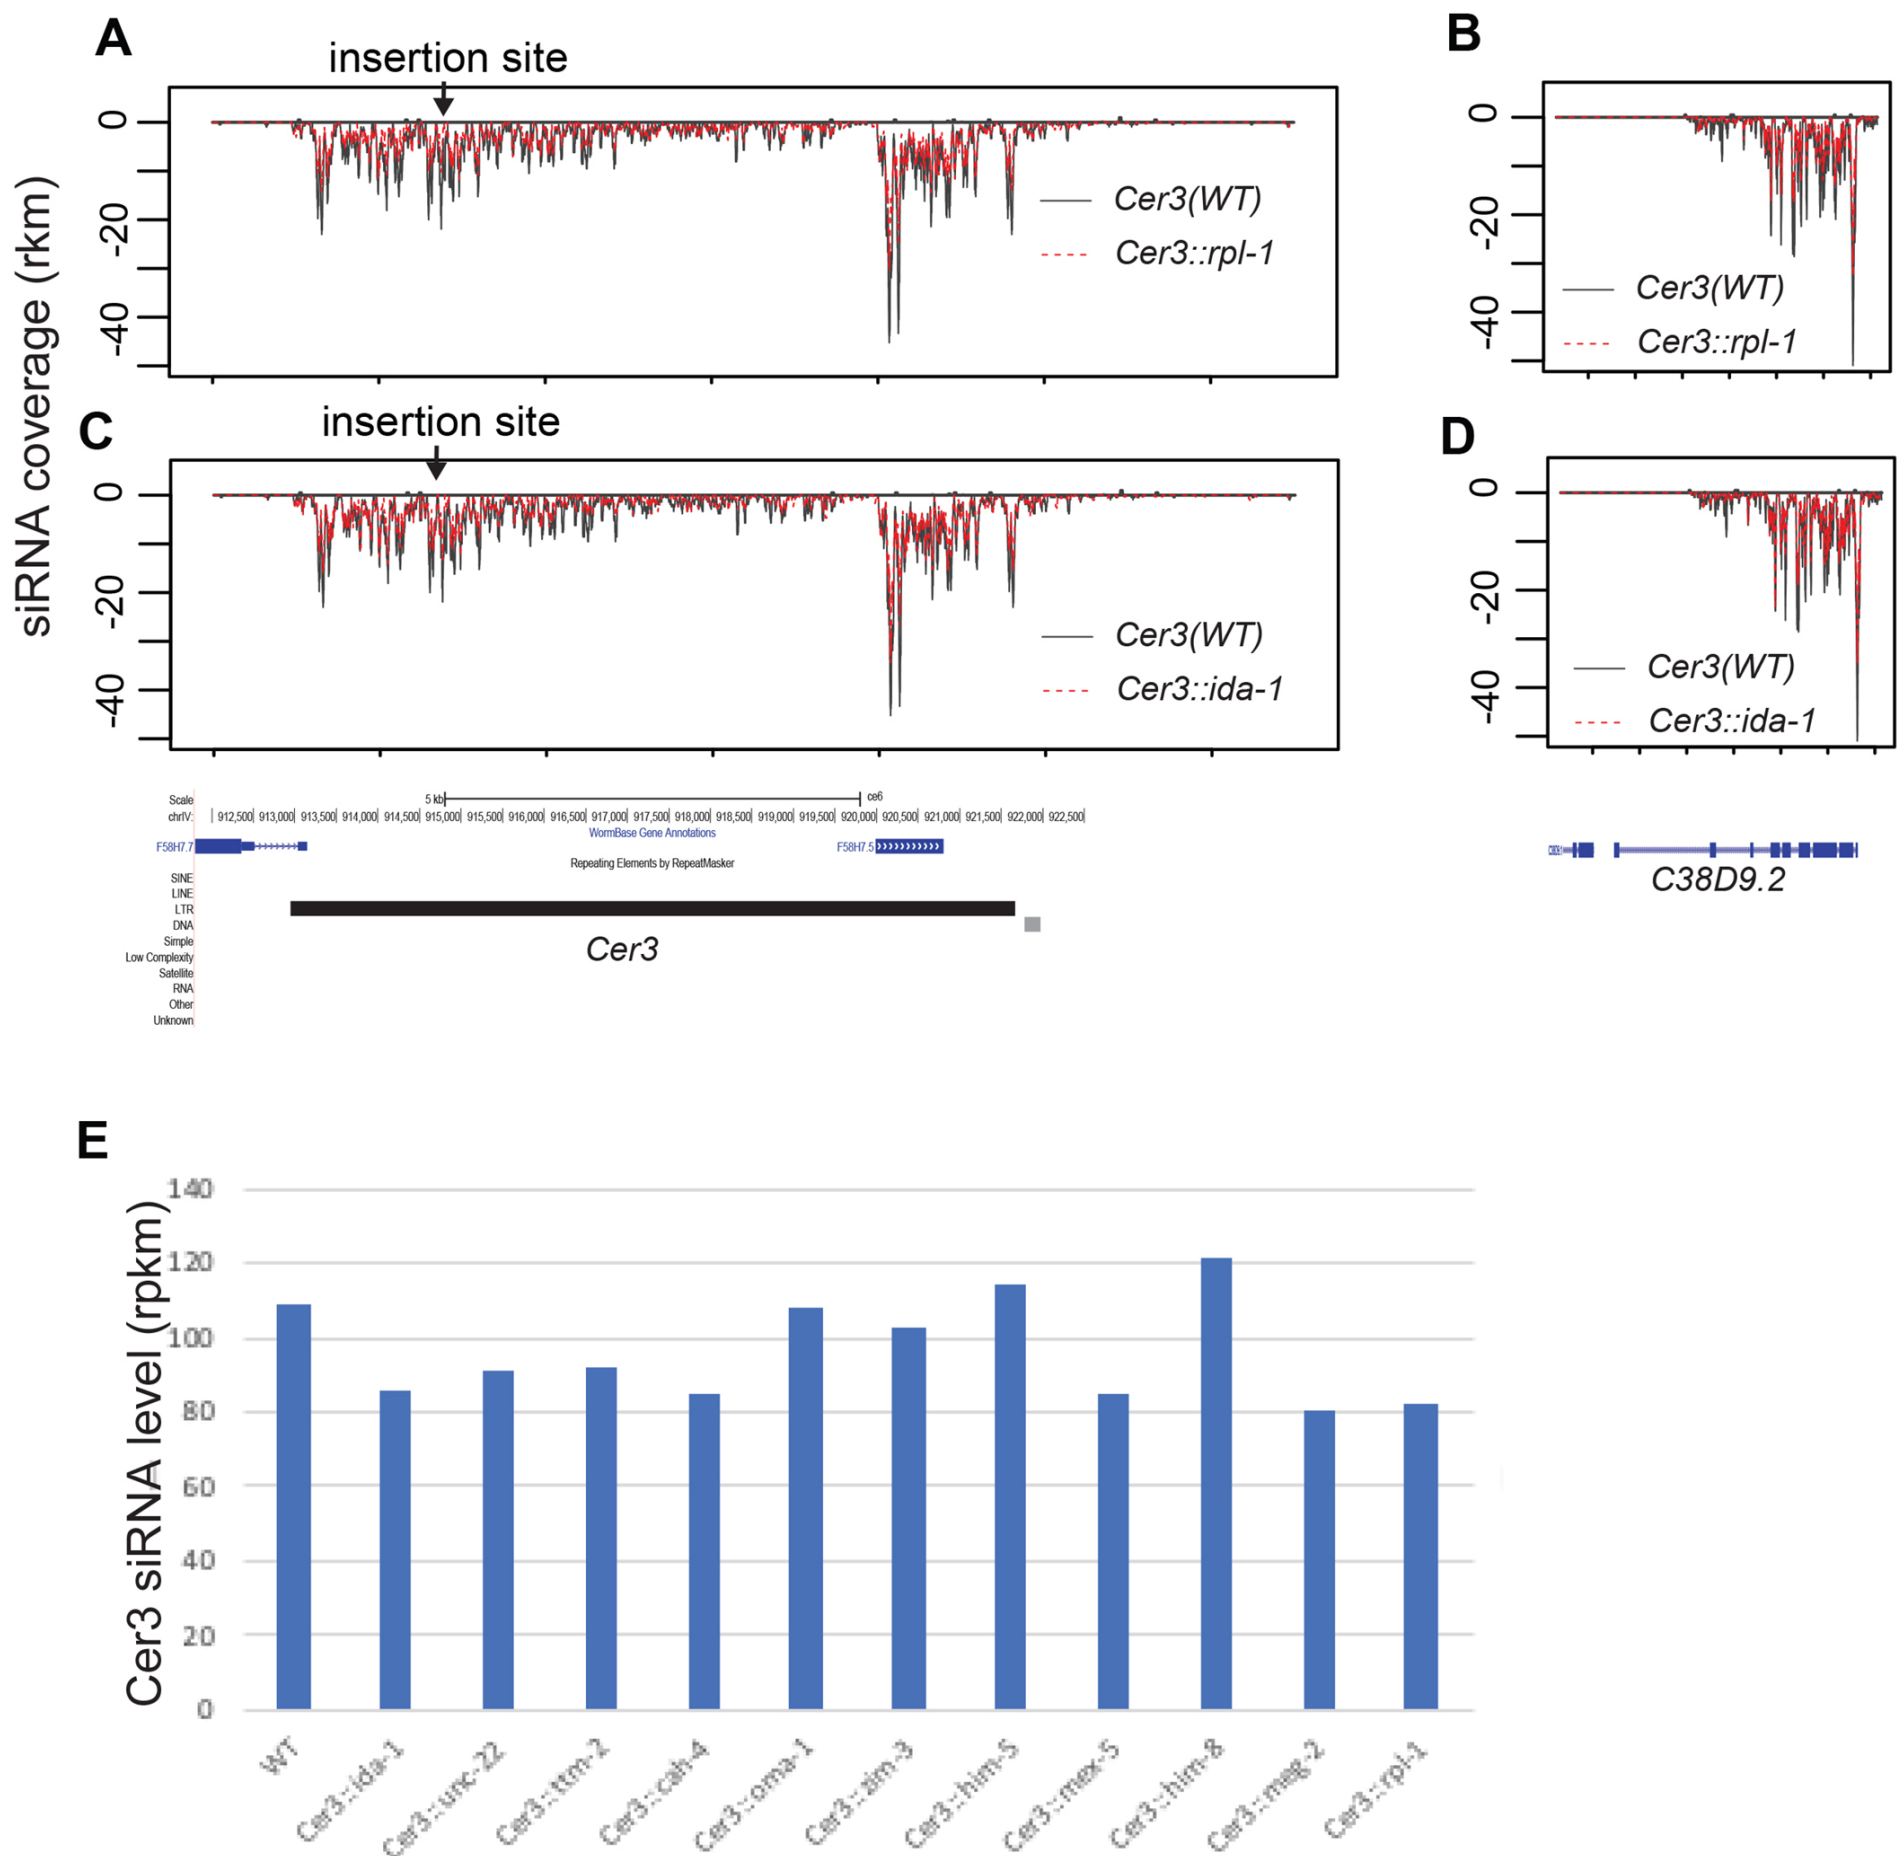

**Fig. S3.** *Cer3* siRNA expression is not affected by insertions. siRNA coverage plots at *Cer3* (A and C) and *c38d9.2* (B and D) are shown for strains carrying WT *Cer3*, *Cer3::rpl-1*, and *Cer3::ida-1* as indicated. Sense and antisense siRNA coverages are separately plotted as positive and negative values. siRNAs derived from the insertion were excluded from this analysis. The WT animals had slightly higher siRNA expressions than the two *Cer3* mutants for *Cer3* and other native nuclear RNAi targets, such as *c38d9.2* (B and D). This is likely due to a slight age difference between the samples (data not shown). (E) Bar graph showing *Cer3* siRNA levels (rpkm) for WT and various *Cer3::insertion* mutant strains.

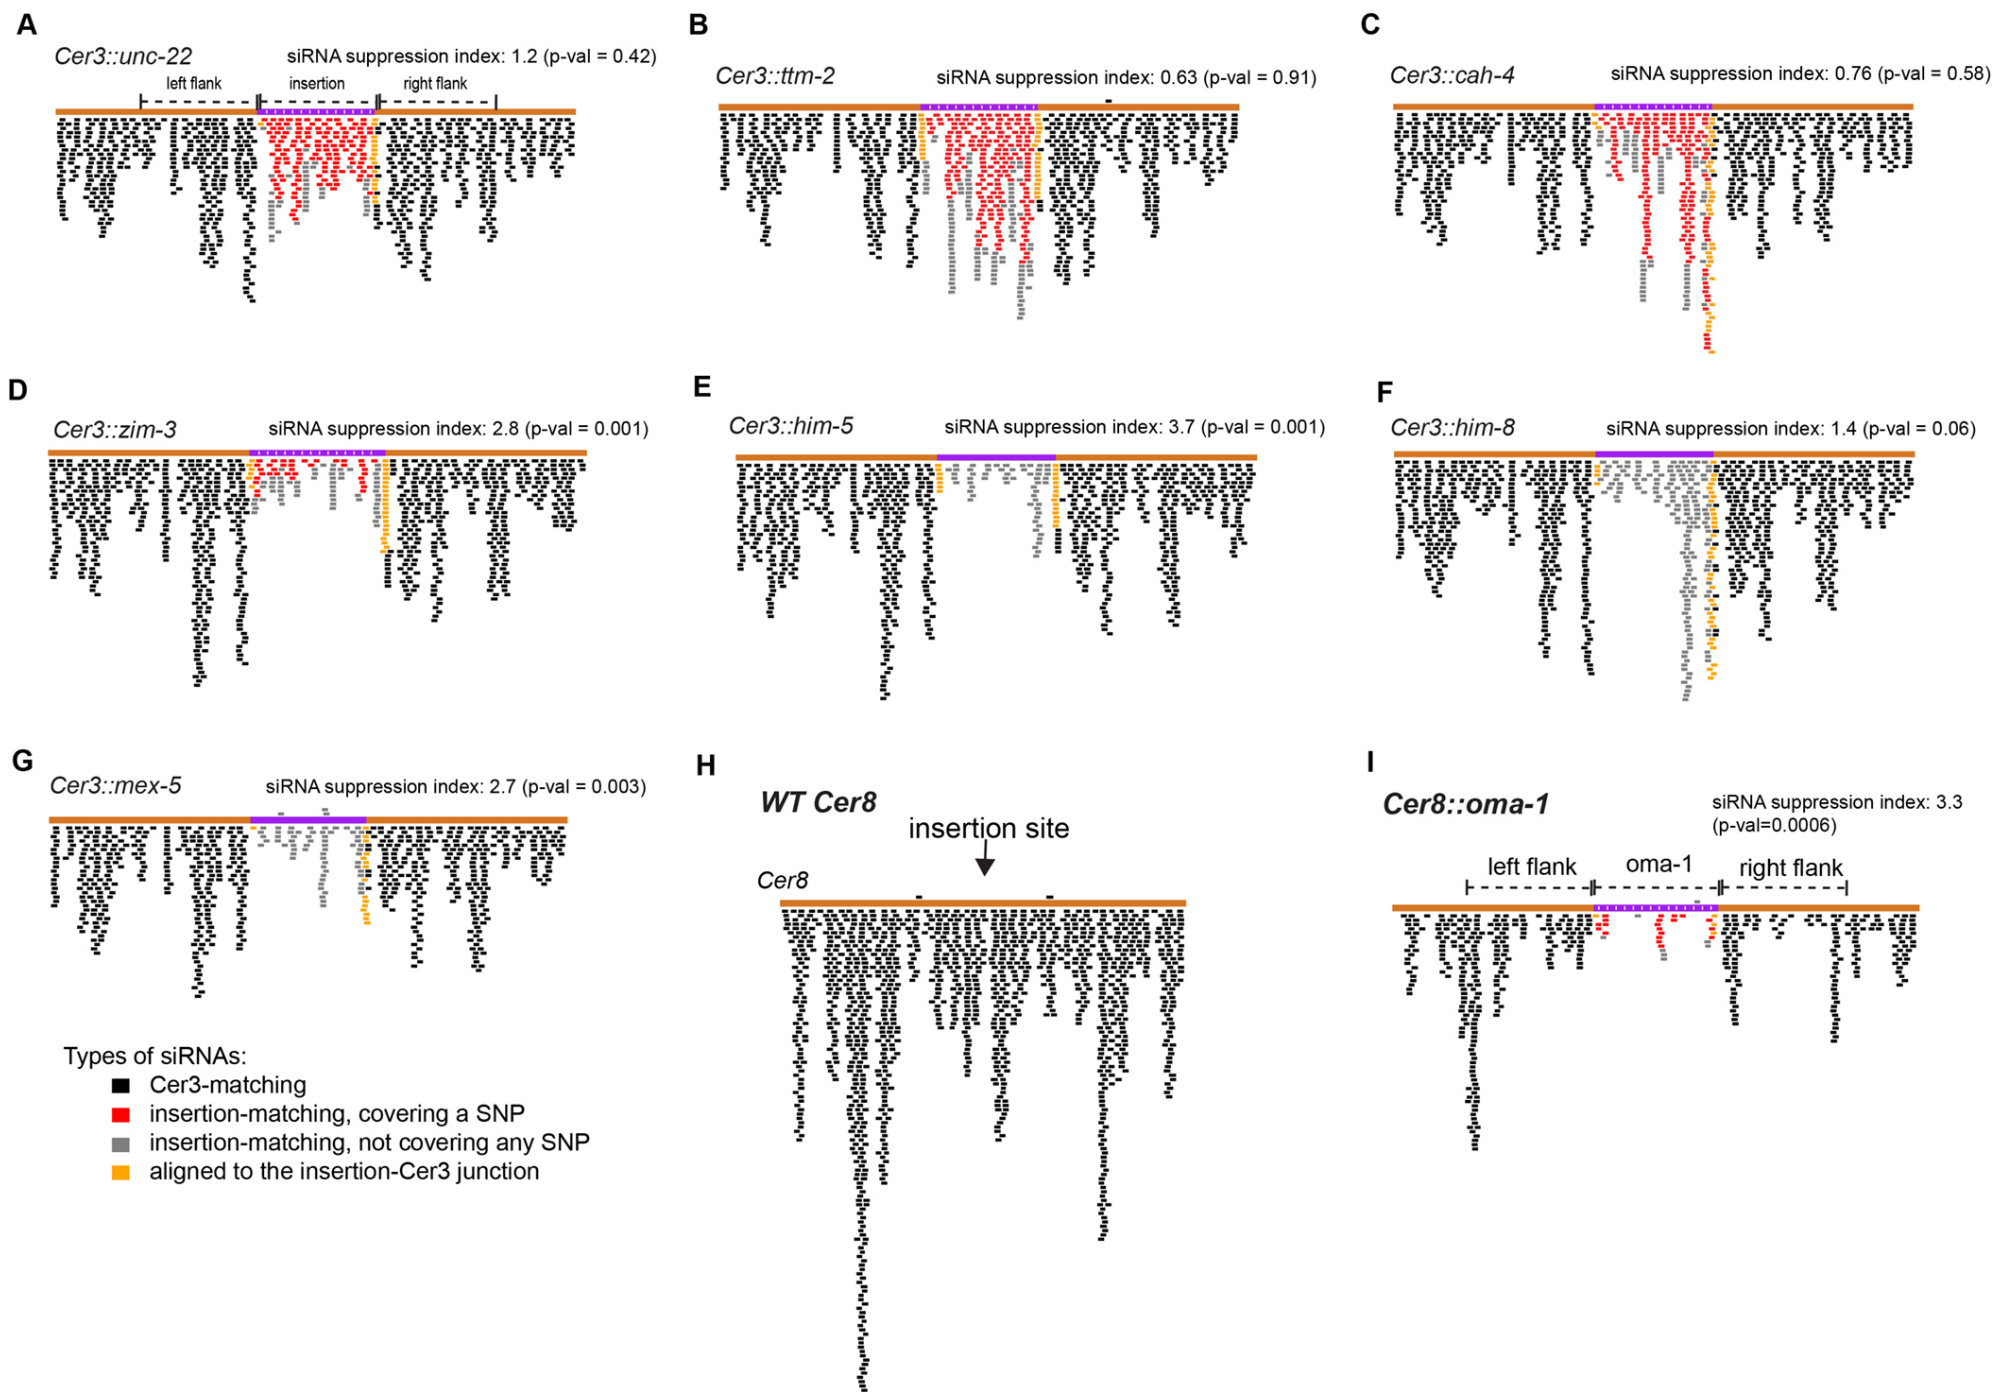

**Fig. S4.** siRNA track plots of additional *Cer3*::insertions (**A-G**), WT LTR retrotransposon *Cer8* (**H**), and *Cer8*::*oma-1* (**I**). Only the 700 nt *Cer8* sequence that flank each side of the insertion site is used for the plots. For *Cer3*::*him-5* (**E**), *Cer3*::*him-8* (**F**), and *Cer3*::*mex-5* (**G**), no SNPs were included in the insertion and therefore the insertion-matching siRNA reads were all colored in gray.

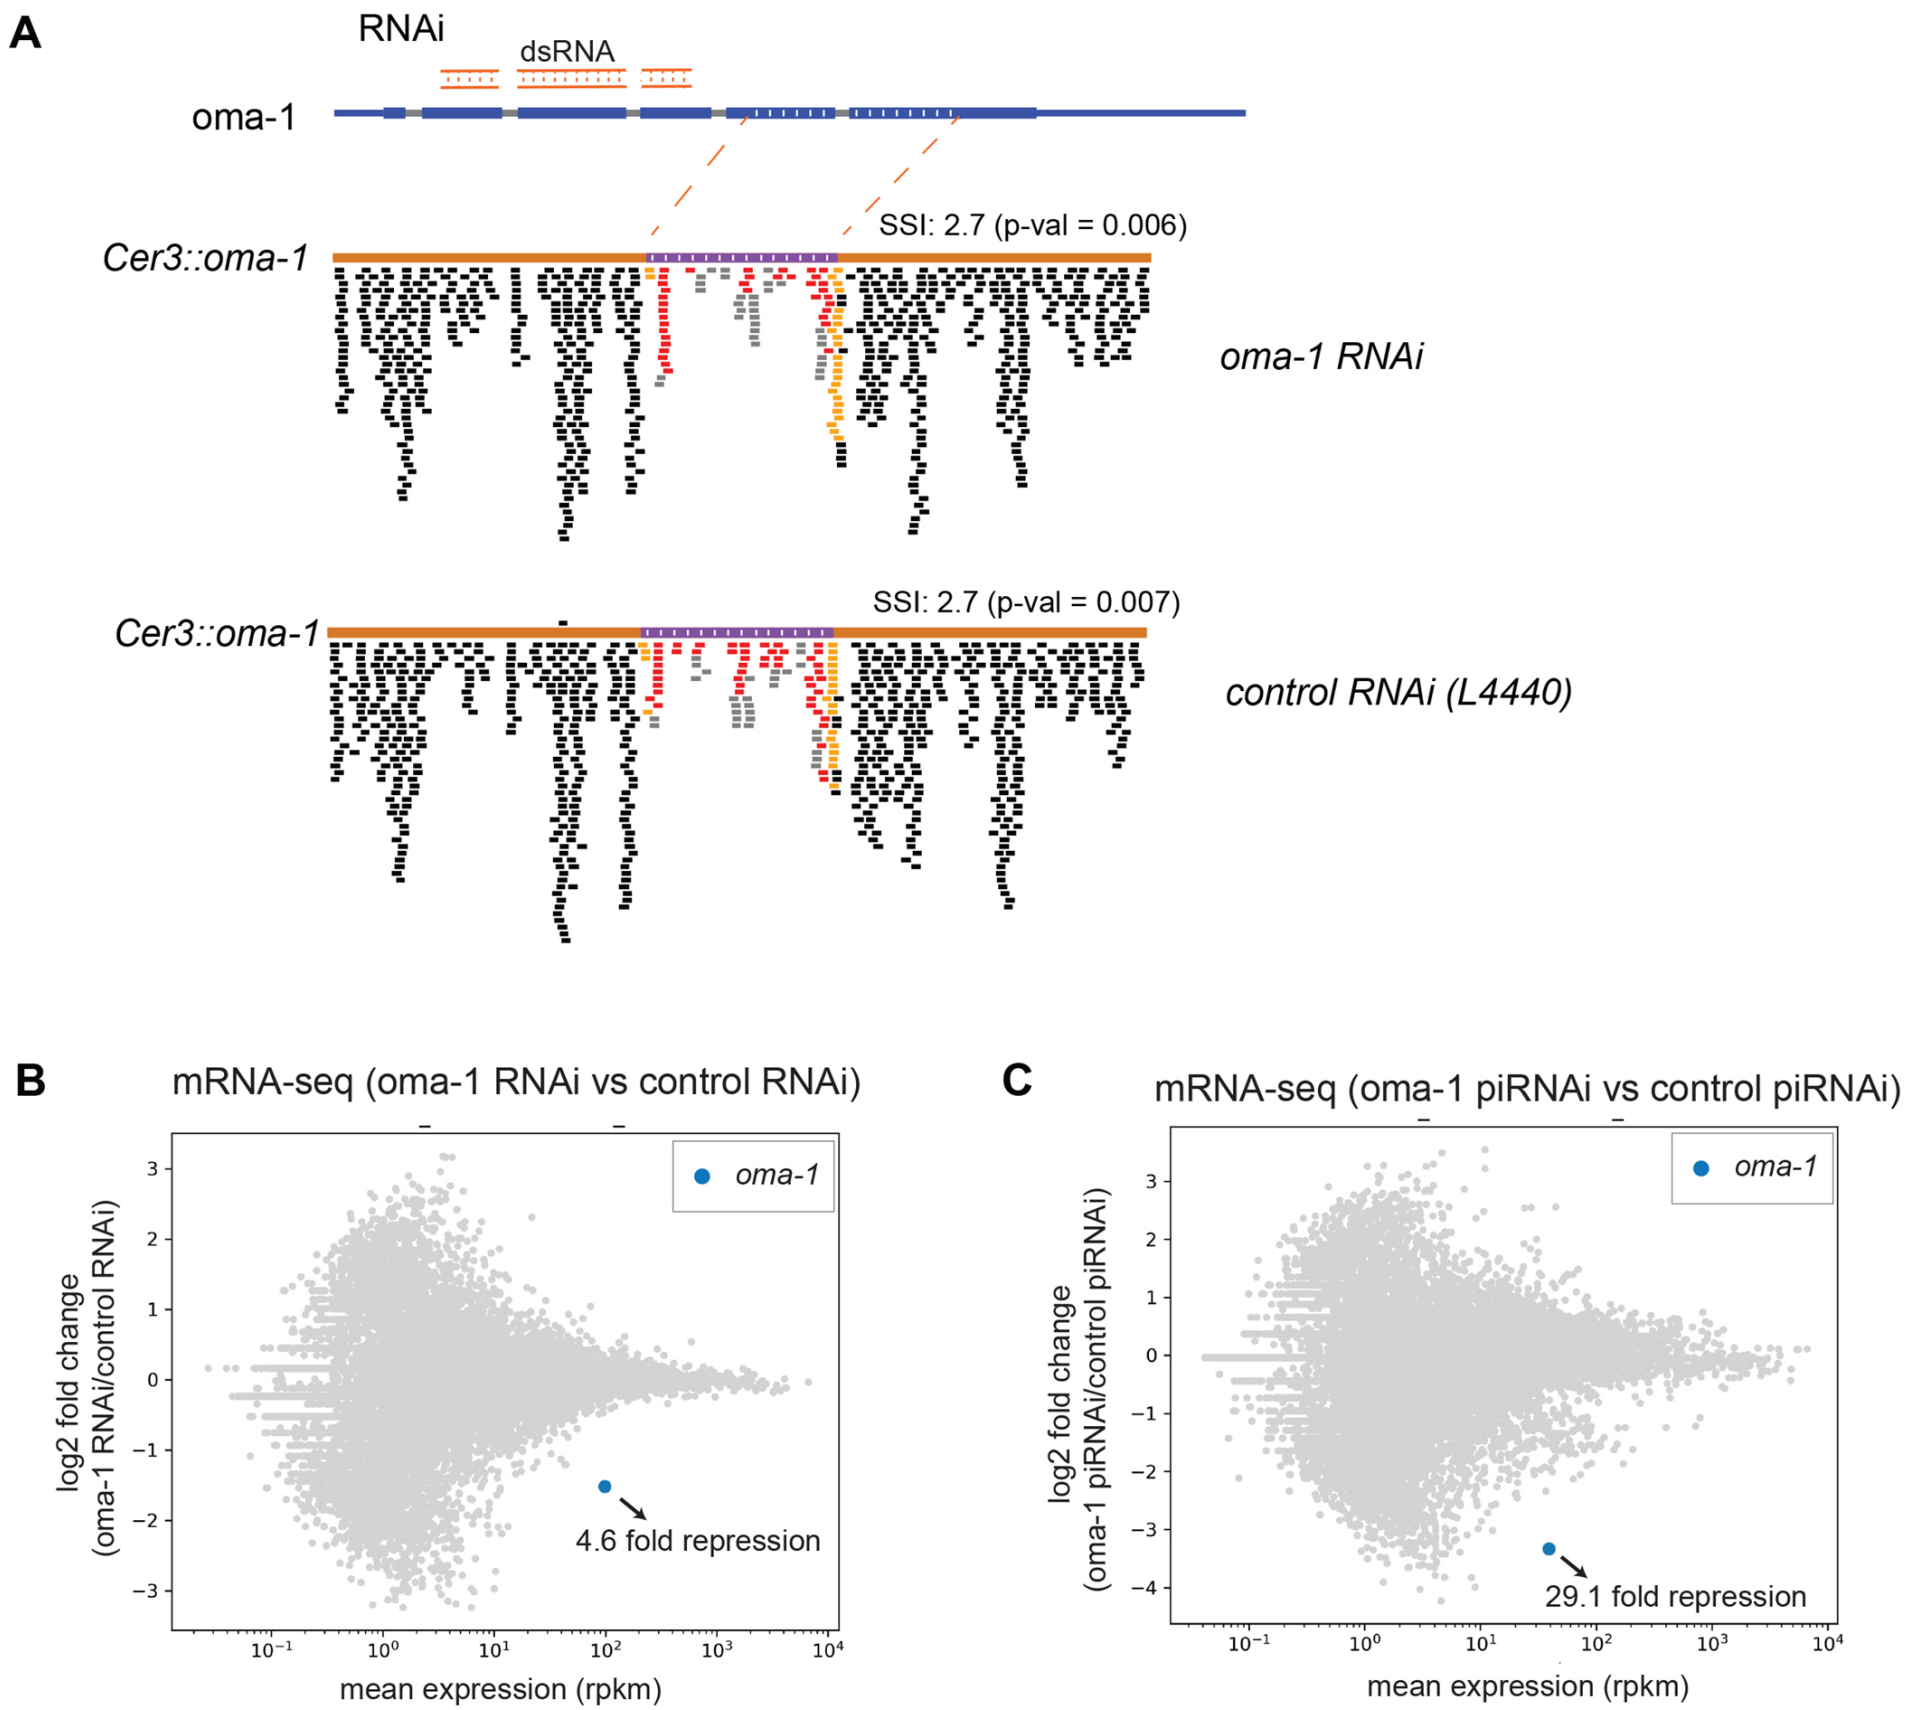

**Fig. S5.** *oma-1* RNAi did not affect siRNA suppression of *Cer3::oma-1*. **(A):** *Cer3::oma-1* siRNA track plot for *oma-1* RNAi or control RNAi (L4440 empty vector) animals. dsRNA targeted region in *oma-1* is indicated. **(B-C):** RNA-seq MA-plots of *oma-1* RNAi vs control (L4440) RNAi and *oma-1* piRNAi vs control (*unc-119*) piRNAi, showing that both *oma-1* dsRNA and piRNA led to *oma-1* mRNA repression, but the dsRNA-triggered repression was weaker than the piRNA-triggered repression.

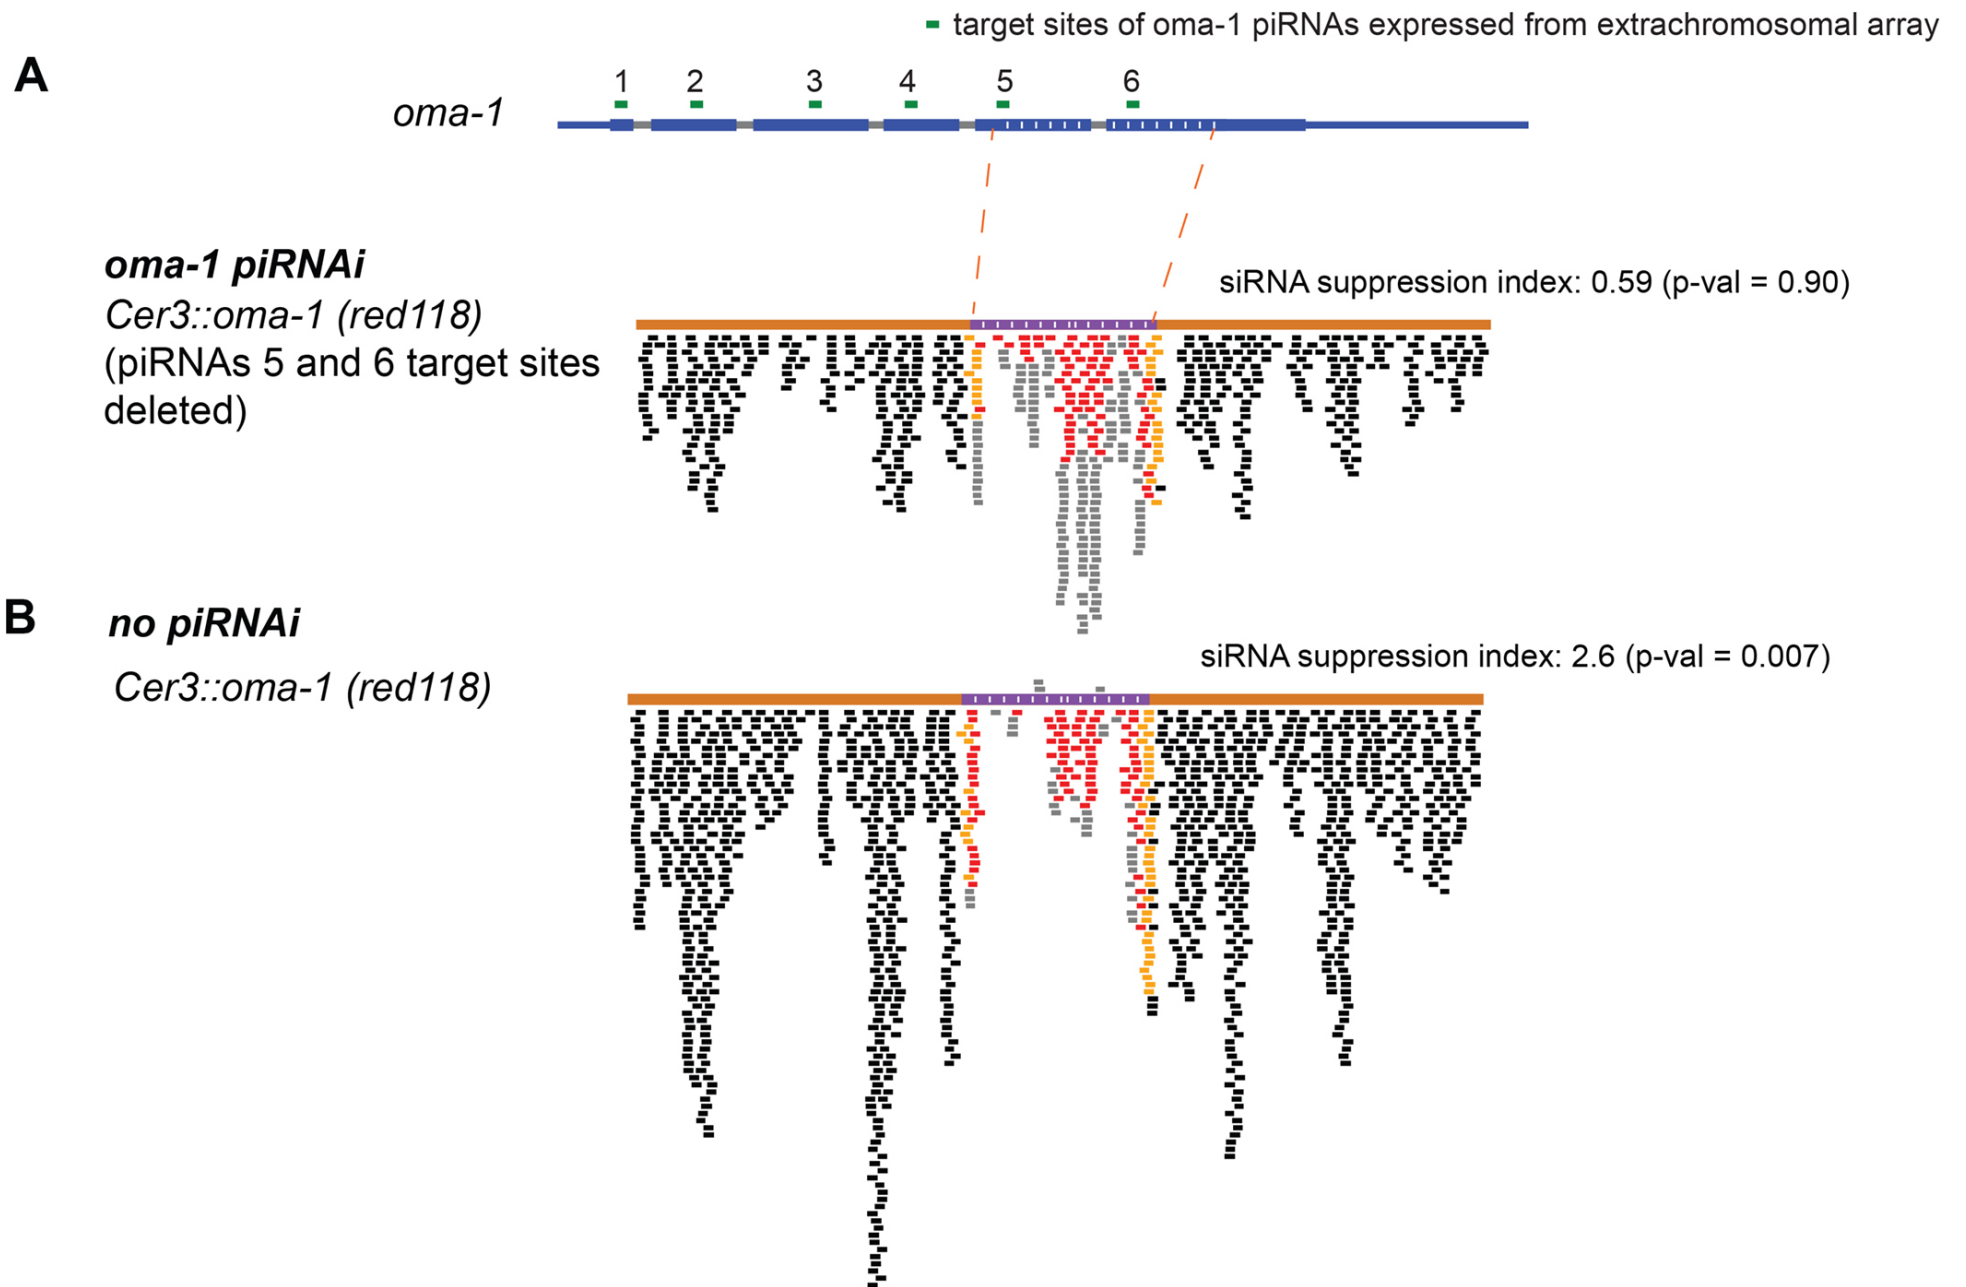

**Fig. S6.** Additional *oma-1* piRNAi experiments. The *oma-1* piRNAi transgene encodes six piRNAs. Their target sites in *oma-1* are indicated in (A). Two of the six piRNAs also target the *oma-1* fragment in *Cer3::oma-1* used in this study. To determine whether the effect of *oma-1* piRNAi on siRNA suppression was mediated by the piRNA target sites in the *Cer3::oma-1*, we generated a *Cer3::oma-1* allele (red118) that lacks these two target sites. The siRNA track plots with and without *oma-1* piRNAi are shown in A and B.

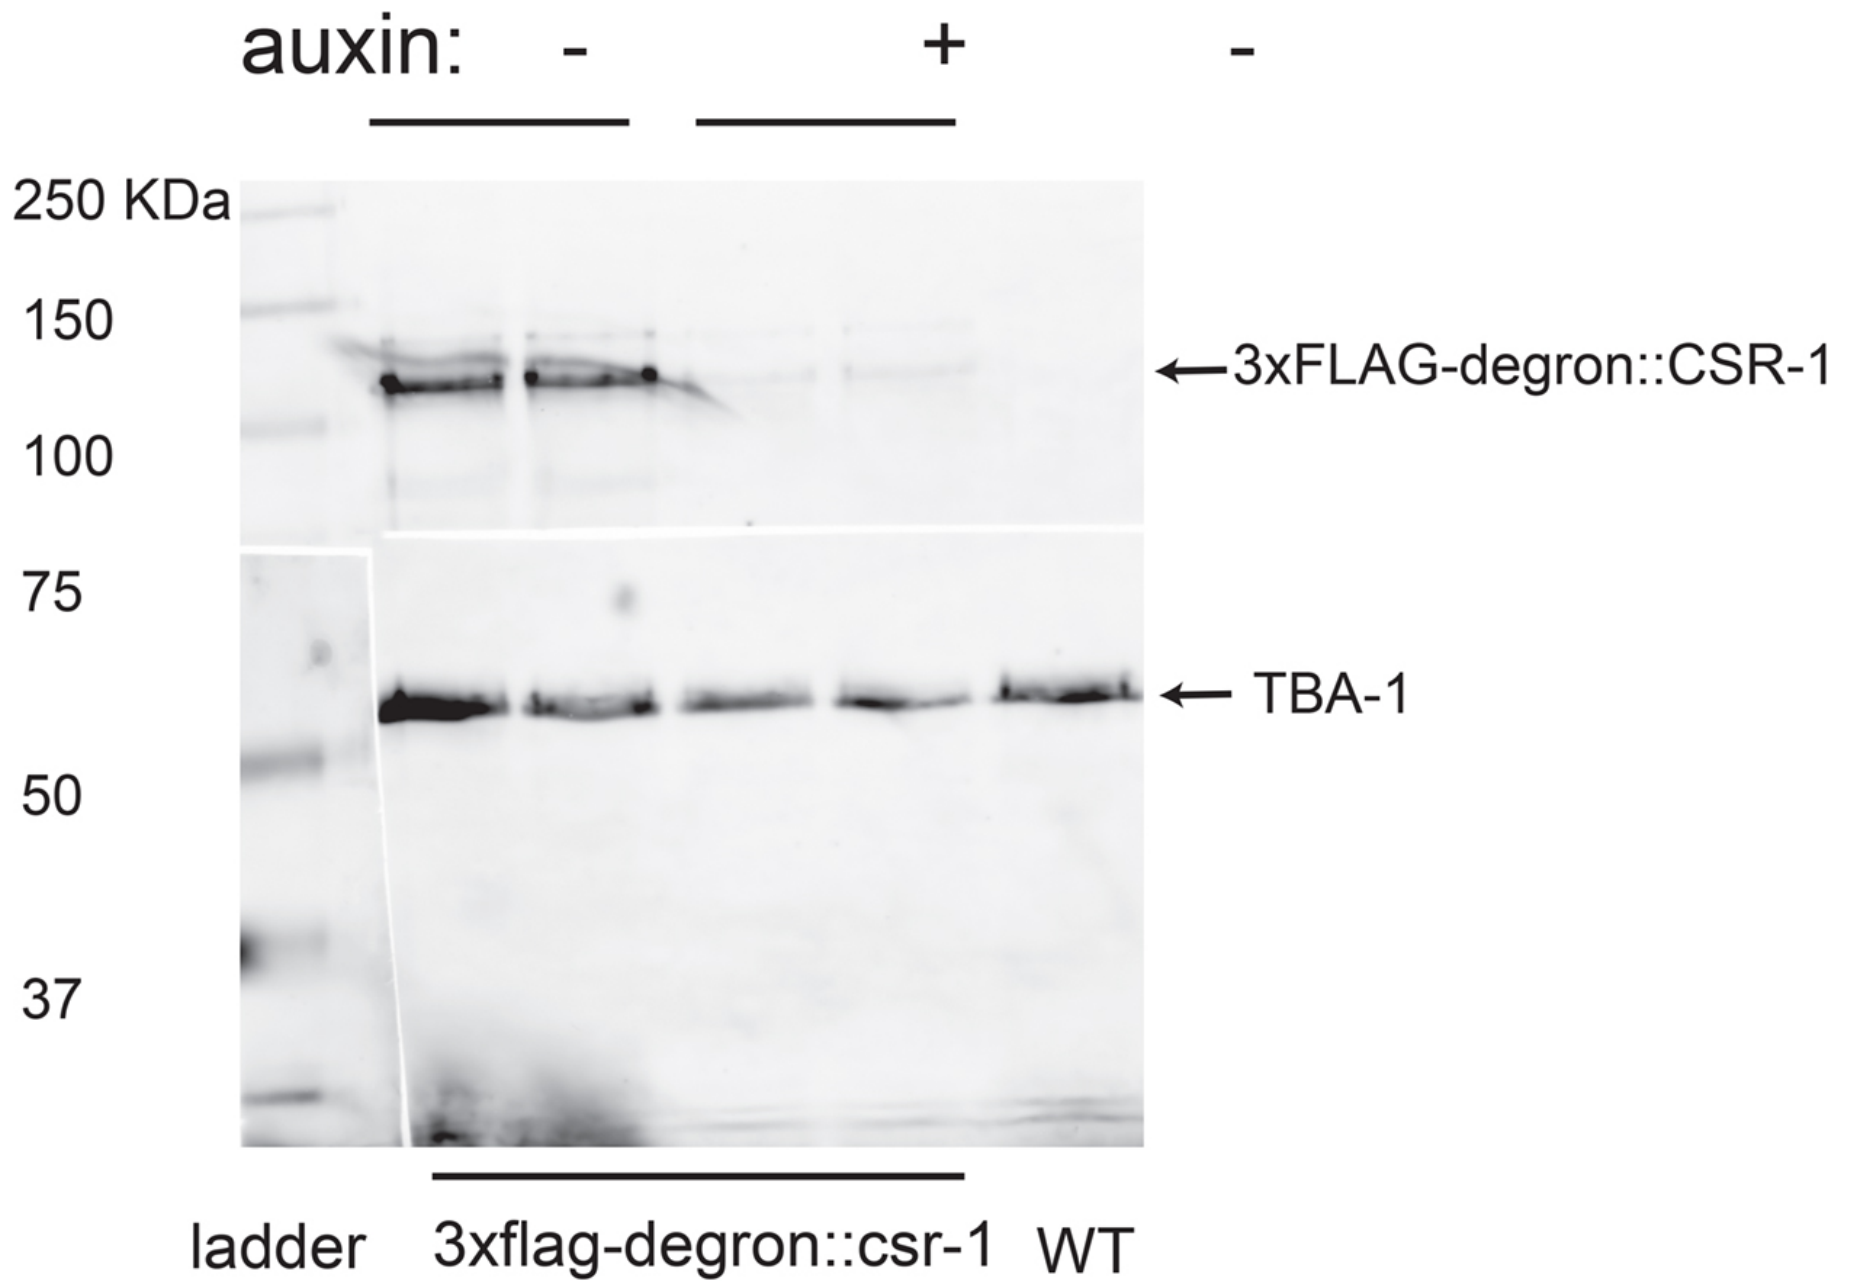

**Fig. S7.** Anti-FLAG western blot of 3xFLAG::degtron::CSR-1 confirming auxin-induced degradation (AID) of CSR-1 (87% reduction). We note that, although the CSR-1 depletion was not complete, the animals exhibited a fully penetrant embryonic lethality, a phenotype expected for the loss-of-function *csr-1* mutation (data not shown).

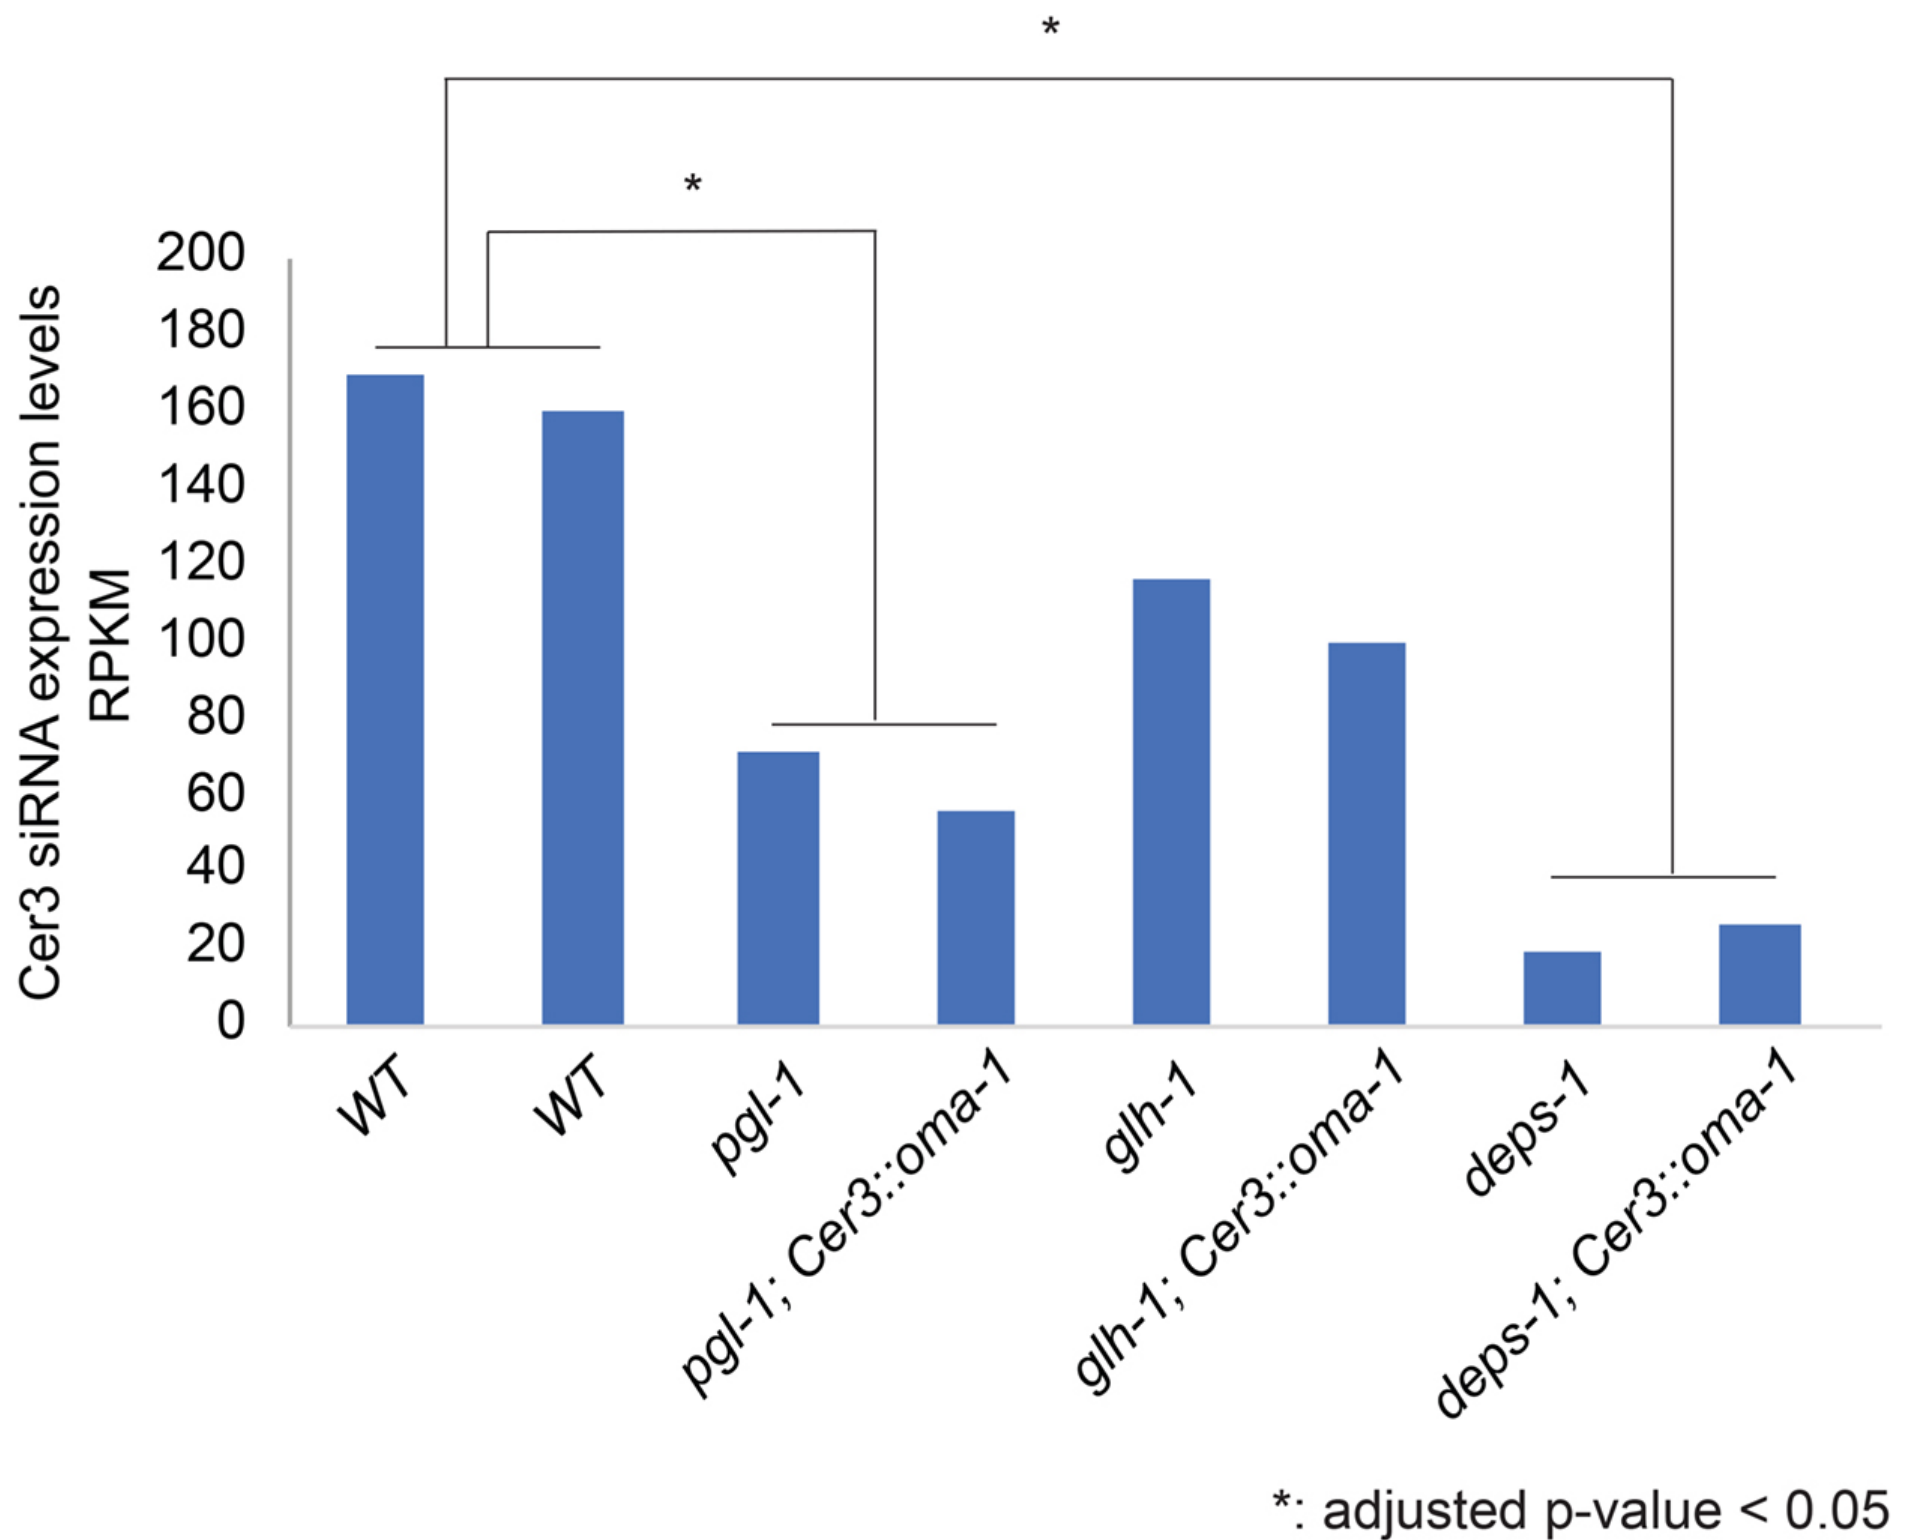

**Fig. S8.** *Cer3* siRNA expression levels in WT and P-granule mutant strains that carry either WT *Cer3* or *Cer3::oma-1*. The full-length WT *Cer3* sequence was used for the alignment to calculate the *Cer3* siRNA levels. DESeq2 (Love, Huber et al. 2014) was used to calculate the adjusted p-values for the comparison between WT and a mutant background. Both *pgl-1* and *deps-1* mutations were associated with significant reductions in *Cer3* siRNA production (3.7 and 9.2-fold reductions, respectively, adjusted p-values <  $1.0 \times 10^{-18}$ ). A modest *Cer3* siRNA reduction was observed in the *glh-1* mutant animals (1.7-fold, adjusted p-values = 0.2).



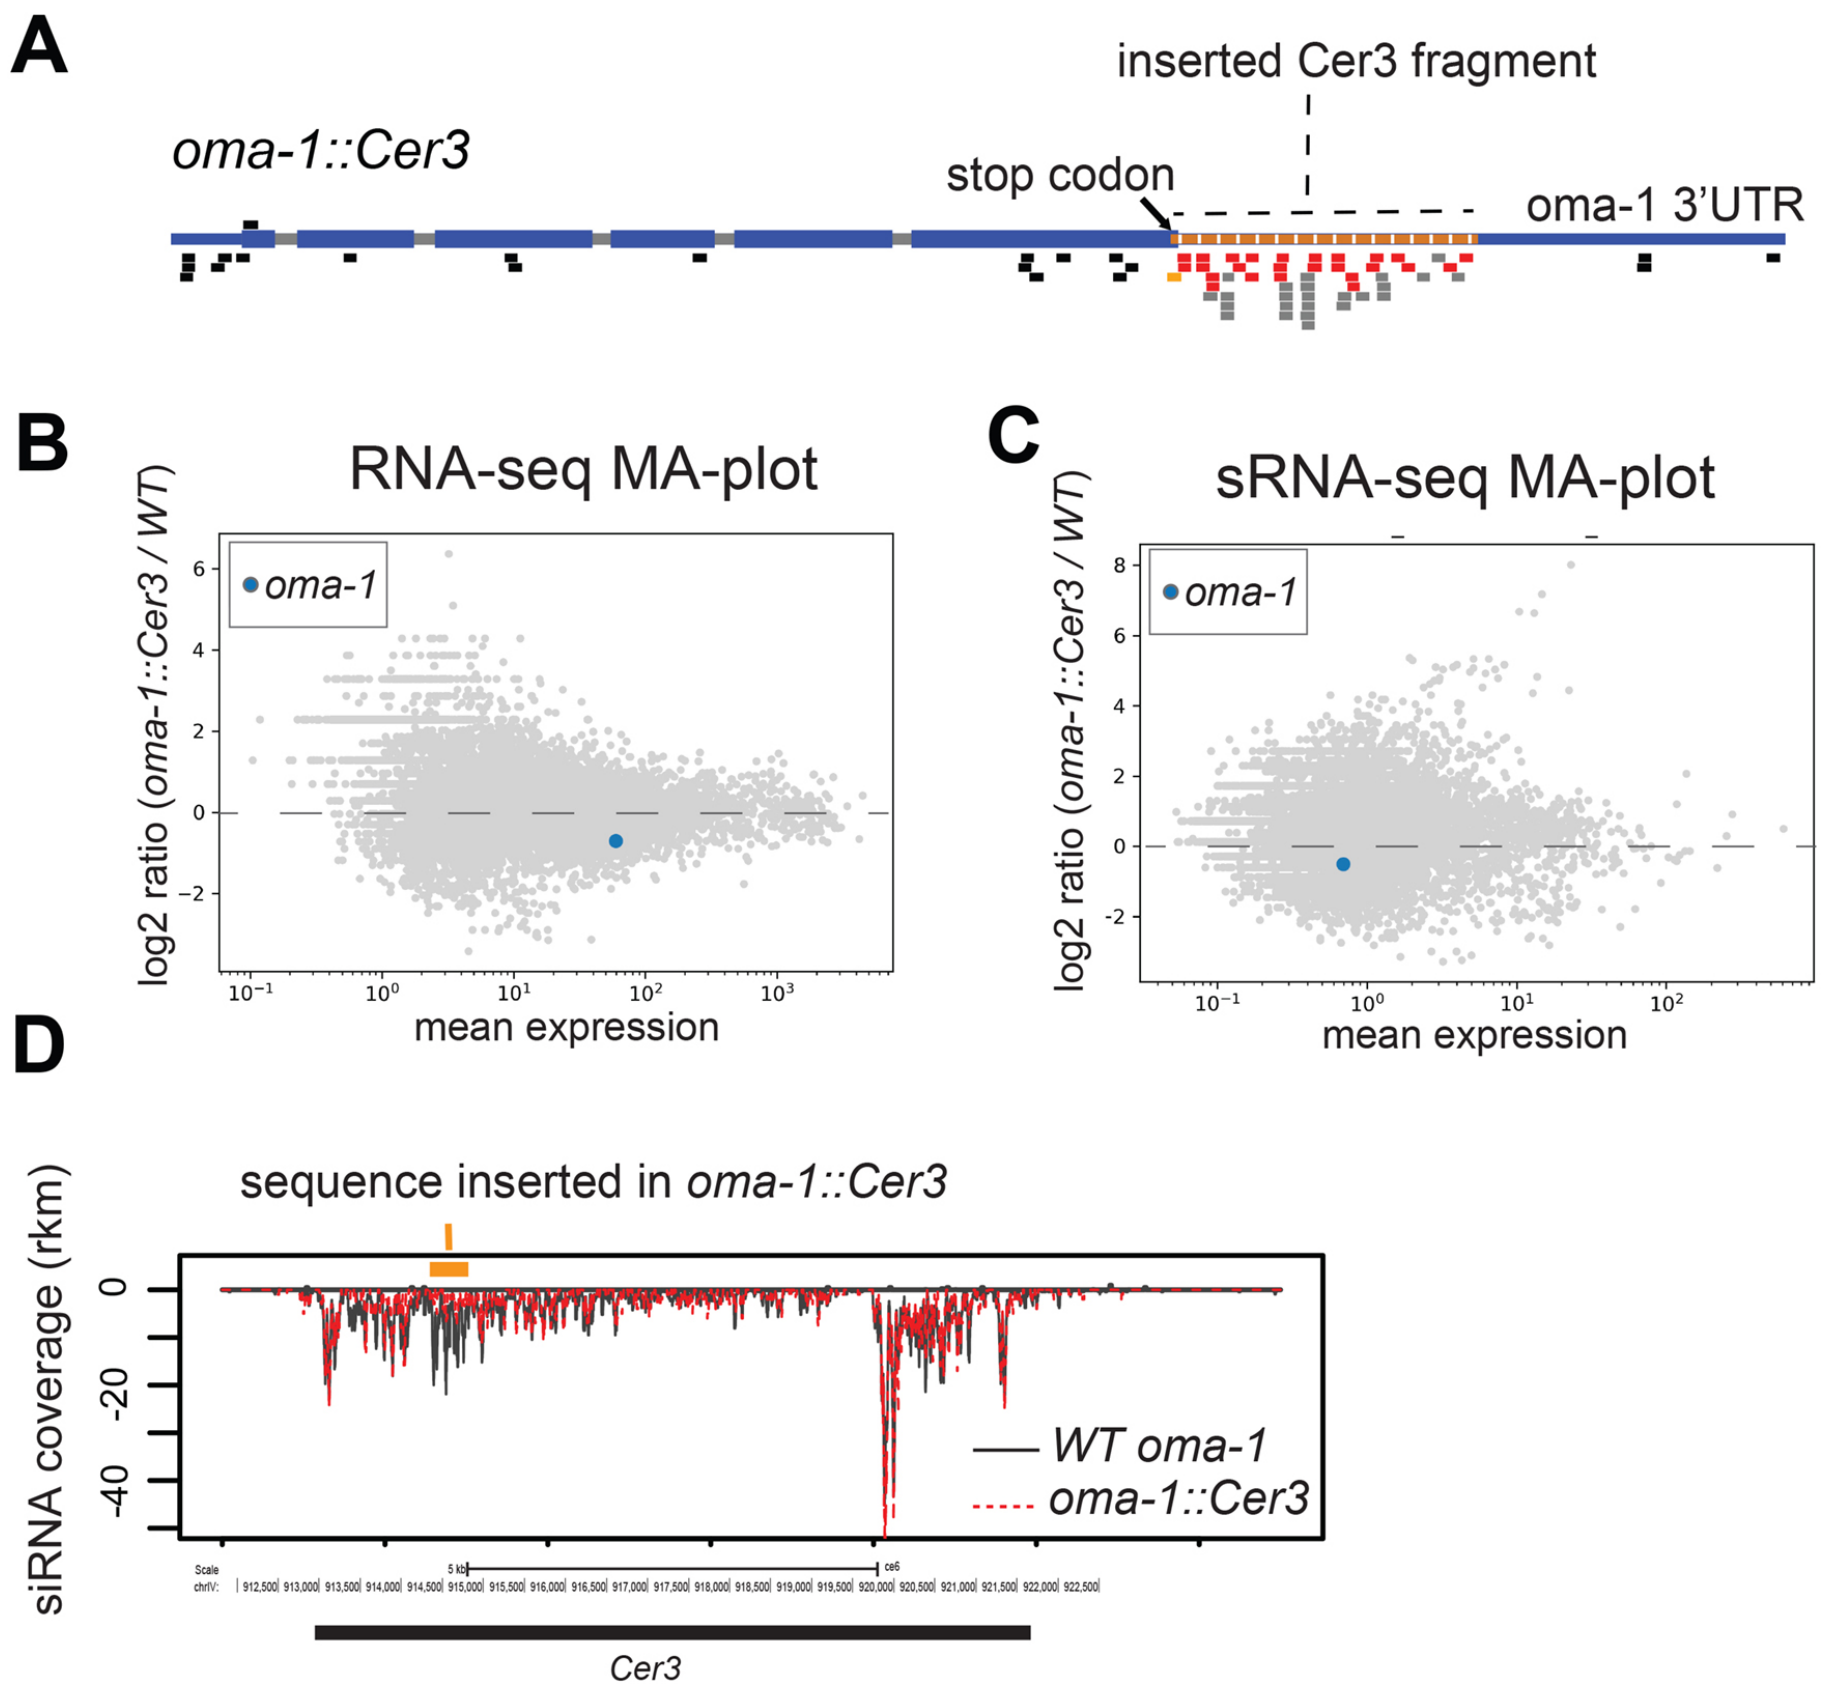

**Fig. S9.** Additional analysis for *oma-1::Cer3* mutant animals. **(A)** A track plot of *Cer3::oma-1* siRNA profile, with SNPs-containing siRNAs colored in red and siRNAs that do not cover any SNP position colored in gray. **(B-C)** MA-plots comparing *oma-1::Cer3* and WT mRNA (B) and siRNA (C) expressions for all genes, with *oma-1* highlighted in blue. The *Cer3* insertion was excluded from the analyses. **(D)** siRNA coverage plot at *Cer3*, normalized to the sequencing depth, for WT and *oma-1::Cer3* animals using the same data as Fig. 5A and 5B.

**Table S1. NGS libraries used in this study.** All Fastq files have been deposited in NCBI with the GEO accession number GSE196847.

[Click here to download Table S1](#)

## Supplementary Materials and Methods

### DNA sequence of mutations created in this study:

1. Insertion site in Cer3 used in this study:

TCGGTTTCAAGACAGCCGCC [ insertion ]ACTTTGCCTCCGTTCAATGG

2. red20 (Cer3::oma-1), upper case: SNPs:

catgactaaCggtcgcattgcagctccccgctttctgcGattcagcatcctttagaaatgtttgccagA  
ccatcaactccagatgagccagcggctaaGttgccactaggaccaactcctgtagtacCcggtggtccaa  
gatatgagctaccaacgaaAgaattgcatgacgcggaaggtgcatgacTtatccaccgtctcgtggcc  
attggatccGtcgatgtttgctctagacgcttggaaatggcCcatcggccagctagtccactcgattcA  
atggttttgggttccgctccaaatgctggTtcgctcggaaatgctcggaaagcaaaatacCctggaggag  
ttctggatattcatctgcCggatccacgccttctcaggatctcagttcCtcgctcactcaatgcagcat

3. red52 (Cer3::gfp), upper case: SNPs:

tccaatgcttctcccgtAaccagaccacatgaagcgtcacgacttcAtcaagtccgcatgccagaggg  
atcgtcGaagagcgtaccatcttctcaaggacgacCgaaactacaagaccggtgccgaggtcaagAtc  
gaggagacaccctcgtcaaccgtatcCagctcaagggaaatcgacttcaaggaggacCgtaacatcctgg  
gacacaagctggagtacTactacaactcccacaacgtctacatcatgCccgacaagcaaaagaacggaat  
caaggtcTacttcaagatccgtcacaacatcgaggacCgatcgggtccaactcggccaccactacaaGaa  
aacacccaatcgggtgacggaccagtcGtcctcccagacaaccactacctctccaccGaatccgacctc  
ccaaggacccaacgagTagcgtgaccacatggtcctcctcaggttcCt

4. red123(Cer3::rpl-1), upper case: SNPs:

agcaccatcttgacgaggctgcccgggaCacattccatcgatgagcgcgatgacttgTagaagcttaa  
caagcagaagaagctcatcTagaagctcggcaagagctacgatgctttcTtcgcttccgaatccttgatc  
aagcagatcGcacgtatcctcgggtccaggactcaacaagCccggaaaattcccttccgctcgttaccacC  
gagaatctctccaaagcaagagtgcagagTtccgcgccaccgtcaagttccagatgaagTaggttctctg  
cctctccgctcgcgctcgggtGacgttggactcaccagaggagcttgtcAccaacatctccctctccatc  
aacttctcCtctcgtcttgaagaagaactggcagaacCtgagatcggt

5. red124(Cer3::unc-22), upper case: SNPs:

gaggaagagcatgatgaatgggtcagatgGaatcagaaccatctccaccaataactaGaatgttccaa  
atctcatcgacggaagaaaCtatagataccgagtatttgctgtcaatgaAgcaggactttccgatctagc  
cgagcttgaAcaactttgttccaagcatccggttctggTgaaggaccaagattgtcagtcattgagG  
gatttgaacgaagaagttggaagatgtgtGacatttgagtgtgaaatcagtggtatctccTagacctgat  
acagatgggtcaaggatgGaaggaacttgttgacaccagcaagtacacActtattaataaggagacaa  
gcaagtcctAattatcaatgacttaacgtctgatgatgcAgatgaataga

6. red126(Cer3::ttm-2), upper case: SNPs:

tggaagtatcaaacagtttagcgaatgctAggattggatgtattctatgatgaaaatcaTaatcggcatt  
tttcaagcgaatctgcatcAgcatcatcttctctttattcacaacagcAgcaacatttctattcaaat  
tgaactaccAcattttgcacctccgagtttttattgcccTggatctccggtatccataaggttcacggtC  
gaaatccaactttacaaccaaggatttaaTattgcatctcacgaagaaaatctcgtcgtTctaaattatg  
aatctatcaaacggcaggtGactccgaagccggtcaattttcagaaaacAtttaactttccaaggagcg  
atcaatttcAttgaaatgctcctacacagatgttttGacaactact

7. red127(Cer3::cah-4), upper case: SNPs:

ctggaacaccagctatgagtcggttaatgAggcactcagcaagcccgatggattggcggAtgttggagtc  
ttcttgaaggaaggaaaatTcaatgacaattaccatggcctgatcgacaGagtgcgcaaagccaccgaa  
atgccacacGaattgccatgccaaaagacttccacattgTgcatcttctcccatccccggacaagagagT  
attcgttacatacctcggatcccttaccGcccaccatacaacgagtggttatctggaGcttgttcaca  
gagcctgtggaggtctcctAcggacagctcaacgtgctccgtaatatcaAccccgcaatcatcgcgct  
gccaagacaCatgcgaccgtgaaatccgatcttccctcaTcttttaatt

8. red47(Cer3::zim-3), upper case: SNPs:

cttaacaagcgaacgagcaaatgaataaGaatcatattattaaatgtaatttcgaaggCtgtaagcaaa  
ttctctcgtggaaacttctGtacggcaacaacgacttctggatcatgcGatgactcatgaaatgaaa  
gtgtctcgtCgtcgcacatgtgaatactcttgagtagcGatccccaaatgaagtatcactatcaaaaG  
atgcatccagaagtgggtgtgatgggtCaatattcagaaagtgttcaatatcgaattCgatgaagtgg  
cgatcttcgatcttttccaGaagtgtctcggagcacattcttccatcatAggaaatattgggaaaccg  
gagataaaGaaatgtaaaaactcgtgaaaaactccGgaagtcgacaatgagaatgtagataaagaT  
tctccaggaccatcacacgatcttttctaCtttcgcagaattcgc

9. red145(Cer3::him-5):

cggtcggttcacagaacagaaatacatcgaaaaaattgccgatggccatattttttgccgagatacaga  
attcgagacaatgcagagagatcagtaggtgcacgtttcaagagcttccacaaaaagaacaagacgaag  
tagtgaatgaagctttttcgaatcttcgagaatatttgaaaaagagggaaacctttctatgcaaagctccg  
gaaagctaactccaagtattcctcaaagcccaagaaagagaaaaatctgtcgcactccaatgacgaagct  
gatagacgcaataagggaaataagaaaactcaaaaaatgcgagtaagaactgccaattgagaaatcgt  
cgaataattctggaattctcaaaaaaagtggatcaggaatcagcgtggcttcta

10. red146(Cer3::him-8):

cgggtgtagacaacgatggaaatattgatgattatgaagagtatcagtcattaccaccgaatgatgatgtt  
attatgaatgaaacagaattgatggatgttgatcgaaccacagtgatgactccattacgaagtcctacat  
ttttcgattatcacaacgaatccggtgatgaagatcagttgaatgagaatgaaatgaaatctccagacag  
caaaaacgacgagattaataaagatgaaatccacaatattcaatgtcatttcccgaactgcaatcgagca  
attgctggaagaggaaatattgaaaactctgtcttatcgcattcattggtccattgcgataaaaact  
ttctgaaatgcaaaaaatgcaagcacacttgtcatacaatccgtcaaatgcg

11. red147a(Cer3::mex-5):

cacccttgacaatcacaacgatgacacgatgagcgtgaaaaggaaaatcatttccatgaacatcgtggc  
gagaagttcggtcgctcgtggattcccaattccagaaactgacagtcacaaccaccaactacaagactc  
gtctttgatgatgcacgcactctggaatcaaacatgtgatatgggtgctcgcgatgcaagtttgcctatgg  
gctcaaagagctcagagctactgatgctccggtcgcctatccgaacaacaagtacaagacaagctgtgc  
aagaactttgcgctggaggaactggattctgcccgtatggacttcggttgcgagtttgttcatccaacgg  
acaaggaattccagaatattcctccatatacagcgcgatgtctc

12. red40 (Cer3::oma-1), upper case: SNPs:

atgctgcattgagtgacgaGgaactgagatcctgagaaggcgtggatccGgcagatgaatatccagaaac  
tcctccaggGgtattttgctttccgagcattccgaacgaAccagcatttggagcggaaacccaaaaccatT  
gaatcgagtggactagctggccgatgGgccatattccaagcgtctagagcaaacatcgaCggatccaatg  
gccagcgagacgggtggataAgtcatcgcaccttccgctcatgcaattcTttcgttggtagctcatact  
tgaccacgGgtactaacaggagttggctcctagtggcaaCttagccgctggctcatctggagttgatggT  
ctggcaaacatttctaaggatgctgaaatCgcagaaagcgggggagctgcaatgcgaccGttagtcatg

13. prg-1(red115), upper case: WT sequence, lower case: mutation :  
TTATTCATCAGCCCGCTCAgctagctGTGAATTCGTGAAGGATGGG
14. prde-1(red139), upper case: WT sequence, lower case: mutation :  
GCATCGATTACCGATGAGGgctagcaACTTttCAGGTCTGAAGGAGCAAAAAG
15. pgl-1(red116), upper case: WT sequence, lower case: mutation :  
AAGTTGTGAACCATATCGCTtAAgCTagcTTTCGAGGAAGCGAGTAAAA
16. glh-1(red117), upper case: WT sequence, lower case: mutation :  
TGAATGTCCGGAGCCACCCCGcTaGctGATGTTTCAATTGTGGCGAG
17. oma-1(red57), oma-1::Cer3 , upper case: oma-1 sequence with stop codon underlined, lower case: Cer3 insertion (with SNPs indicated in the upper case):  
TGACCAAGCATCTCAATTGAaccccccaagaAacgtggtgtctggaagcagtgacgtagtGacgctactga  
ctcttctggaagtggatccTcgatgccatcgagctcaccagaatcgtgacAtcgtcgaagaacaatcggaa  
gatcagcaaTtcaatagtggtgagcttgccggagatcaaAatgatctagaagaagcaacaattcaattT  
gtggaatttcgcttcaattggagtgatcAgtttcaagacagccgccactttgcctccgCtcaatggaaa  
cttgactgaagatttcacaGccttcgtgcaaaagttcaaggatcggctaAcagcgtctacagagatggac  
aacgatcaaGagaggtctacattccttttatttttggacGatcgcgcgaggagtagcggccgatggaataG  
ttggagcacagcctgcgattacactcagAatcttatcacaagatgtcagcagtggtcAagaatgcTTG  
TGGTGAACAACCTTCTCT
18. Cer8(red35), Cer3::oma-1, upper case: Cer8 sequence, lower case: oma-1 insertion (with SNPs indicated in the upper case):  
CCATTTGAAGAAATCCAAGTcatcatgactaaCggtcgcattgcagctcccccgctttctgcGattcagc  
atcctttagaaatgtttgccagAccatcaactccagatgagccagcggctaaGttgccaactaggaccaac  
tcctgttagtacCggtggtccaagatatgagctaccaacgaaAgaattgcatgacgcggaagggtgcatg  
acTtatccaccgtctcgtggtccattggatccGtcgatggttgctctagacgcttggaaatggcCcatc  
ggccagctagtccactcgattcAatggttttgggttccgctccaaatgctggTtcggttcggaatgctcgg  
aaagcaaaatacCcttgaggagtttctggatattcatctgcCggatccacgccttctcaggatctcagt  
tcCtctcactcaatgcagcatCATCGCCTGAGTAGTGCAGC
19. red118 (Cer3::oma-1), upper case: SNPs:  
attgcagctccccgctttctgcGattcagcatcctttagaaatgtttgccagAccatcaactccagatg  
agccagcggctaaGttgccaactaggaccaactcctgttagtacCggtggtccaagatatgagctaccaac  
gaaAgaattgcatgacgcggaagggtgcatgacTtatccaccgtctcgtggtccattggatccGtcgatg  
tttgccCcatcggccagctagtccactcgattcAatggttttgggttccgctccaaatgctggTtcggttc  
ggaatgctcggaaagcaaaatacCcttgaggagtttctggatattcatctgcCggatccacgccttctc  
aggatctcagttcCtctcactcaatgcagcat

## Reference:

- Kodoyianni, V., E. M. Maine and J. Kimble (1992). "Molecular basis of loss-of-function mutations in the *glp-1* gene of *Caenorhabditis elegans*." *Mol Biol Cell* **3**(11): 1199-1213.
- Love, M. I., W. Huber and S. Anders (2014). "Moderated estimation of fold change and dispersion for RNA-seq data with DESeq2." *Genome Biol* **15**(12): 550.
- Nelson, G. A., K. K. Lew and S. Ward (1978). "Intersex, a temperature-sensitive mutant of the nematode *Caenorhabditis elegans*." *Dev Biol* **66**(2): 386-409.
- Ni, J. Z., E. Chen and S. G. Gu (2014). "Complex coding of endogenous siRNA, transcriptional silencing and H3K9 methylation on native targets of germline nuclear RNAi in *C. elegans*." *BMC Genomics* **15**: 1157.
- Ortiz, M. A., D. Noble, E. P. Sorokin and J. Kimble (2014). "A new dataset of spermatogenic vs. oogenic transcriptomes in the nematode *Caenorhabditis elegans*." *G3 (Bethesda)* **4**(9): 1765-1772.
